# Supplementary material for: Psychological Backgrounds of Medically Compromised Patients and Its Implication in Dentistry: A Narrative Review
Source: MDPI journal article supplement (doi:10.3390/ijerph18168792), 2021-08-20
Supplement: s1 [file s1]

## Supplementary File S1

### Search strategy

An electronic search was made on PubMed using the following search terms for each of four diseases: (diabetes) AND (psychology), (cardiovascular disease) AND (psychology), (renal disease) AND (psychology), (connective tissue disease) AND (psychology).

The search builder used following queries to search for each disease.

- ("diabete"[All Fields] OR "diabetes mellitus"[MeSH Terms] OR ("diabetes"[All Fields] AND "mellitus"[All Fields]) OR "diabetes mellitus"[All Fields] OR "diabetes"[All Fields] OR "diabetes insipidus"[MeSH Terms] OR ("diabetes"[All Fields] AND "insipidus"[All Fields]) OR "diabetes insipidus"[All Fields] OR "diabetic"[All Fields] OR "diabetics"[All Fields] OR "diabets"[All Fields]) AND ("psychologie"[All Fields] OR "psychologies"[All Fields] OR "psychology"[MeSH Subheading] OR "psychology"[All Fields] OR "psychology"[MeSH Terms] OR "psychology s"[All Fields])
- ("cardiovascular diseases"[MeSH Terms] OR ("cardiovascular"[All Fields] AND "diseases"[All Fields]) OR "cardiovascular diseases"[All Fields] OR ("cardiovascular"[All Fields] AND "disease"[All Fields]) OR "cardiovascular disease"[All Fields]) AND ("psychologie"[All Fields] OR "psychologies"[All Fields] OR "psychology"[MeSH Subheading] OR "psychology"[All Fields] OR "psychology"[MeSH Terms] OR "psychology s"[All Fields])
- ("kidney diseases"[MeSH Terms] OR ("kidney"[All Fields] AND "diseases"[All Fields]) OR "kidney diseases"[All Fields] OR ("renal"[All Fields] AND "disease"[All Fields]) OR "renal disease"[All Fields]) AND ("psychologie"[All Fields] OR "psychologies"[All Fields] OR "psychology"[MeSH Subheading] OR "psychology"[All Fields] OR "psychology"[MeSH Terms] OR "psychology s"[All Fields])
- ("connective tissue diseases"[MeSH Terms] OR ("connective"[All Fields] AND "tissue"[All Fields] AND "diseases"[All Fields]) OR "connective tissue diseases"[All Fields] OR ("connective"[All Fields] AND "tissue"[All Fields] AND "disease"[All Fields]) OR "connective tissue disease"[All Fields]) AND ("psychologie"[All Fields] OR "psychologies"[All Fields] OR "psychology"[MeSH Subheading] OR "psychology"[All Fields] OR "psychology"[MeSH Terms] OR "psychology s"[All Fields])

The filters applied were: Timeline set to year 2020; articles in the last 5 years; studies limited to systematic review and meta-analysis; articles in English.

After applying filters, resulting studies were further screened for their final inclusion.

|   | Disease                      | Search term                                        | Search result<br>(number of<br>articles) | After applying<br>filters<br>(number of<br>articles) | Final inclusion<br>(number of<br>articles) |
|---|------------------------------|----------------------------------------------------|------------------------------------------|------------------------------------------------------|--------------------------------------------|
| 1 | Diabetes                     | (diabetes) AND<br>(psychology)                     | 28317                                    | 437                                                  | 16                                         |
| 2 | Cardiovascular<br>disease    | (cardiovascular<br>disease) AND<br>(psychology)    | 61281                                    | 942                                                  | 13                                         |
| 3 | Renal disease                | (renal disease)<br>AND (psychology)                | 8474                                     | 111                                                  | 10                                         |
| 4 | Connective<br>tissue disease | (connective<br>tissue disease)<br>AND (psychology) | 7200                                     | 101                                                  | 10                                         |
